# Supplementary material
Source: publisher site journal article supplement (https://www.dovepress.com/article/413371)
Supplement: Supplementary file 1 [file get_supplementary_file.php]

**Supplementary Materials**

Supplementary Table 1 Population, concept, and context (PCC) framework

| **Element** | **Content** |
| --- | --- |
| Population | Patients diagnosed with schizophrenia according to any of the standardized diagnostic criteria will be included. No restrictions on patient characteristics such as gender, ethnicity, age, or regions will be applied. |
| Concept | Evidence of treatment efficacy/effectiveness, safety, treatment adherence and patients’ attitude of LAIs. |
| Context | The context of this review is Asian population diagnosed with schizophrenia. No restriction will be applied to countries. |

Supplementary Table 2 Databases, search strategies and results

| Database | Search Strategy (2022-04-01) | Results |
| --- | --- | --- |
| PubMed | #1 (schizophrenia[MeSH Terms]) OR (schizophrenia[title/abstract])  #2 (scale[Title/Abstract]) OR (score[Title/Abstract]) OR (Syndrome[Title/Abstract]) OR (Schedule[Title/Abstract]) OR ("quality of Life"[Title/Abstract]) OR (QoL[Title/Abstract]) OR (rehospitalization[Title/Abstract]) OR (re-hospitalization[Title/Abstract]) OR (recurrence[Title/Abstract]) OR (relapse[Title/Abstract]) OR (adherence[Title/Abstract]) OR (compliance[Title/Abstract]) OR ("adverse reactions"[Title/Abstract])OR ("adverse effect"[Title/Abstract]) OR (safety[Title/Abstract]) OR (endpoint[Title/Abstract]) OR (outcome[Title/Abstract]) OR (efficacy[Title/Abstract])  #3 (chinese[text Word]) OR (china[text Word]) OR (Hongkong[text Word]) OR (Taiwan[text Word]) OR (Macau[text Word]) OR (Asia[text Word]) OR (Asian[text Word]) OR (Asia[Mesh Terms])  #4 ("2012"[Date - Publication] : "3000"[Date - Publication])  #5 (long acting[Title/Abstract]) OR (LAI[Title/Abstract]) OR (monthly[Title/Abstract]) OR (long term[Title/Abstract])  #1 and #2 and #3 and #4 and #5 | 201 |
| Embase | #1 schizophrenia:ab,ti,kw  #2 (scale or score or syndrome or schedule or 'quality of life' or QoL or rehospitalization or re-hospitalization or recurrence or relapse or adherence or compliance or 'adverse reactions' or 'adverse effect' or safety):ab,ti,kw  #3 (chinese or china or Hongkong or Taiwan or Macau or Asia or Asian)  #4 [2012-2022]/py  #5 (long acting or LAI or monthly or long term):ab,ti,kw  #1 and #2 and #3 and #4 and #5 | 217 |
| Pscyinfo | #1 schizophrenia  #2 (scale or score or syndrome or schedule or quality of life or QoL or rehospitalization or re-hospitalization or recurrence or relapse or adherence or compliance or adverse reactions or adverse effect or safety)  #3 Year: 2012 To 9999  #4 (long acting or LAI or monthly or long term)  #1 and #2 and #3 and #4 | 2 |
| CINAHL | #1 schizophrenia  #2 (scale or score or syndrome or schedule or quality of life or QoL or rehospitalization or re-hospitalization or recurrence or relapse or adherence or compliance or adverse reactions or adverse effect or safety)  #3 Year: 2012 To 9999  #4 (long acting or LAI or monthly or long term)  #5 (chinese or china or Hongkong or Taiwan or Macau or Asia)  #1 and #2 and #3 and #4#1 and #2 and #3 and #4 and #5 | 75 |
| CNKI | #1 TKA=(精神分裂 + 精神分裂症)  #2 TKA=(量表 + 评分 + 依从 + 复发 + 生活质量 + 生存质量 + 安全性 + 不良反应 + 住院 + 入院)  #3 2012-至今  #4 TKA=(长效)  #1 and #2 and #3 and #4 | 13 |
| Wanfang | #1 (题名或关键词:(精神分裂 or 精神分裂症) or 摘要:(精神分裂 or 精神分裂症))  #2 (题名或关键词:(量表 or 评分 or 依从 or 复发 or 生活质量 or 生存质量 or 安全性 or 不良反应 or 住院 or 入院) or 摘要:(量表 or 评分 or 依从 or 复发 or 生活质量 or 生存质量 or 安全性 or 不良反应 or 住院 or 入院))  #3 Date:2012-*  #4 (题名或关键词:(长效) or 摘要:(长效))  #1 and #2 and #3 and #4 | 15 |

***Note. The search strategy conducted in CNKI and Wanfang were presented in Chinese since these two literature databases were Chinese literature repositories. CNKI: Chinese National Knowledge Infrastructure.***
